# Supplementary material for: A rapid synthesis of molecularly imprinted polymer nanoparticles for the extraction of performance enhancing drugs (PIEDs)
Source: Royal Society of Chemistry journal article supplement (doi:10.1039/d3na00422h), 2023-01-01
Supplement: d3na00422h1.pdf [file d3na00422h1.pdf]

## A Rapid Synthesis of Molecularly Imprinted Polymer Nanoparticles for the Extraction of Performance Enhancing Drugs (PIEDs).

Mark V. Sullivan<sup>ab\*</sup>, Connor Fletcher<sup>b</sup>, Rachel Armitage<sup>bc</sup>, Chester Blackburn<sup>ab</sup>, Nicholas W. Turner<sup>ab\*</sup>

<sup>a</sup> Department of Chemistry, Dainton Building, University of Sheffield, Brook Hill, Sheffield S3 7HF, United Kingdom.

<sup>b</sup> Leicester School of Pharmacy, De Montfort University, The Gateway, Leicester, LE1 9BH, United Kingdom.

<sup>c</sup> School of Archaeology and Ancient History, University of Leicester, University Road, Leicester, LE1 7RH

\*n.w.turner@sheffield.ac.uk

\*mark.sullivan@sheffield.ac.uk

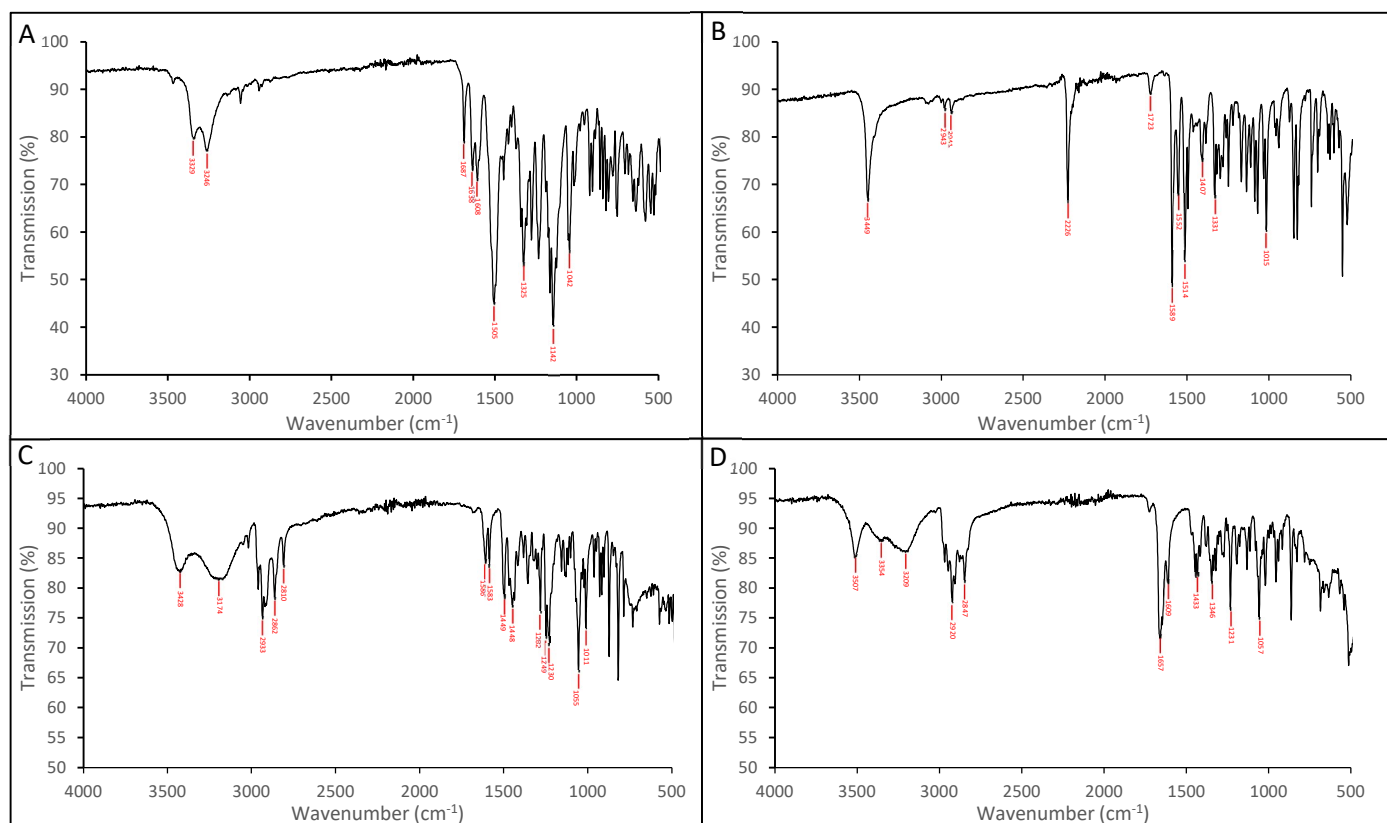

**Figure S1:** FTIR spectra of the imprinted target molecules: Andarine (A), RAD-140 (B), Estradiol (C) and Gestrinone (D), obtained using a Bruker FT-IR spectrometer (alpha model).

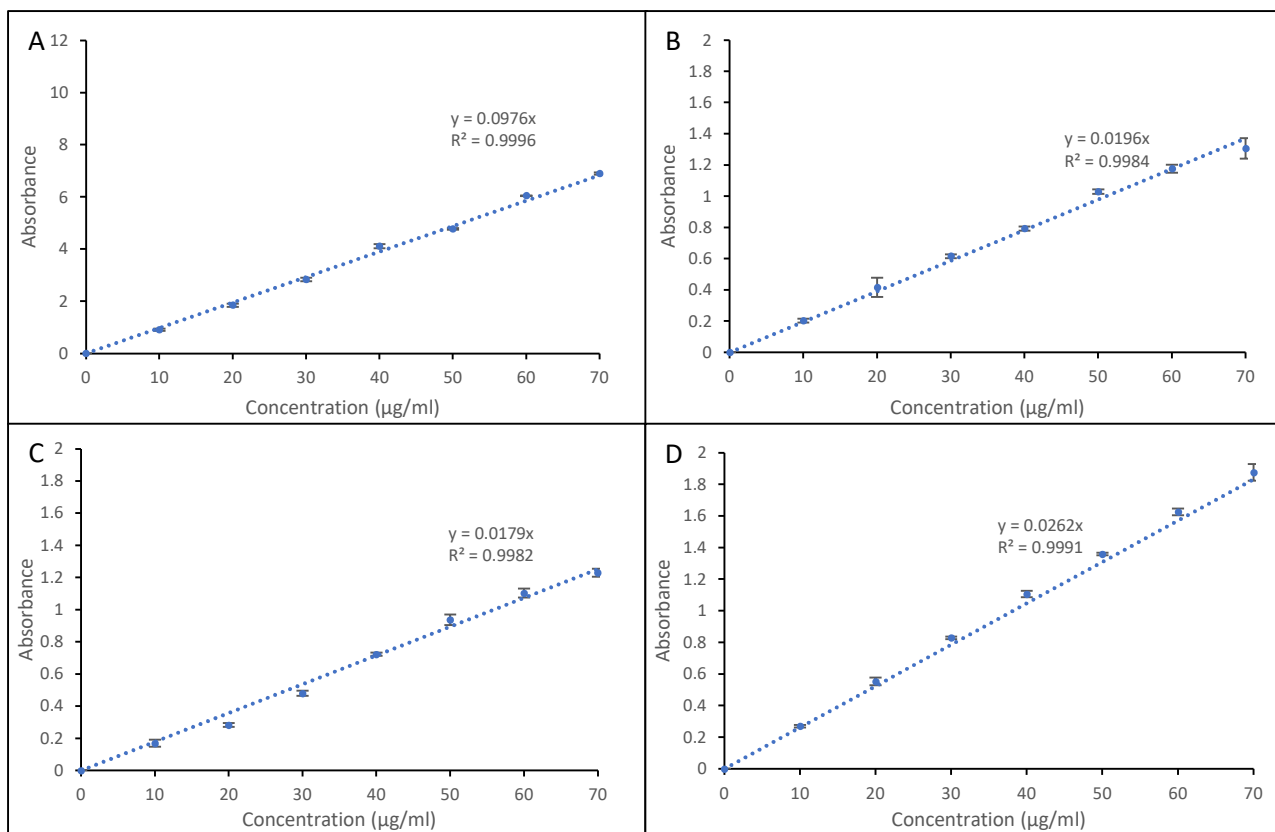

**Figure S2:** Calibration plots of the target molecules: Andarine (A), RAD-140 (B), Estradiol (C) and Testosterone (D), obtained using a Nanodrop One Spectrophotometer.

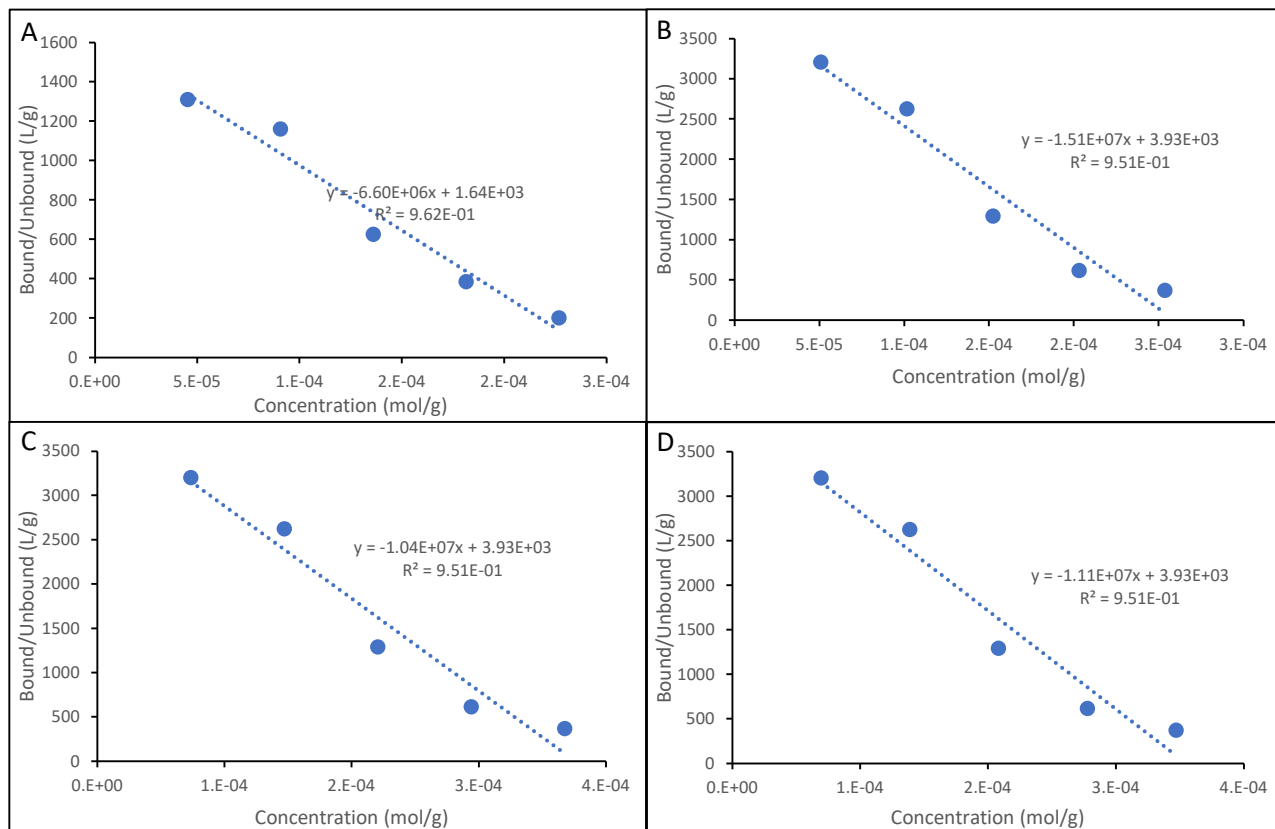

**Figure S3:** Scatchard analysis plot for the rebinding of the target molecules to their corresponding nanoMIPS: andarine (A), RAD-140 (B), estradiol (C), testosterone (D).

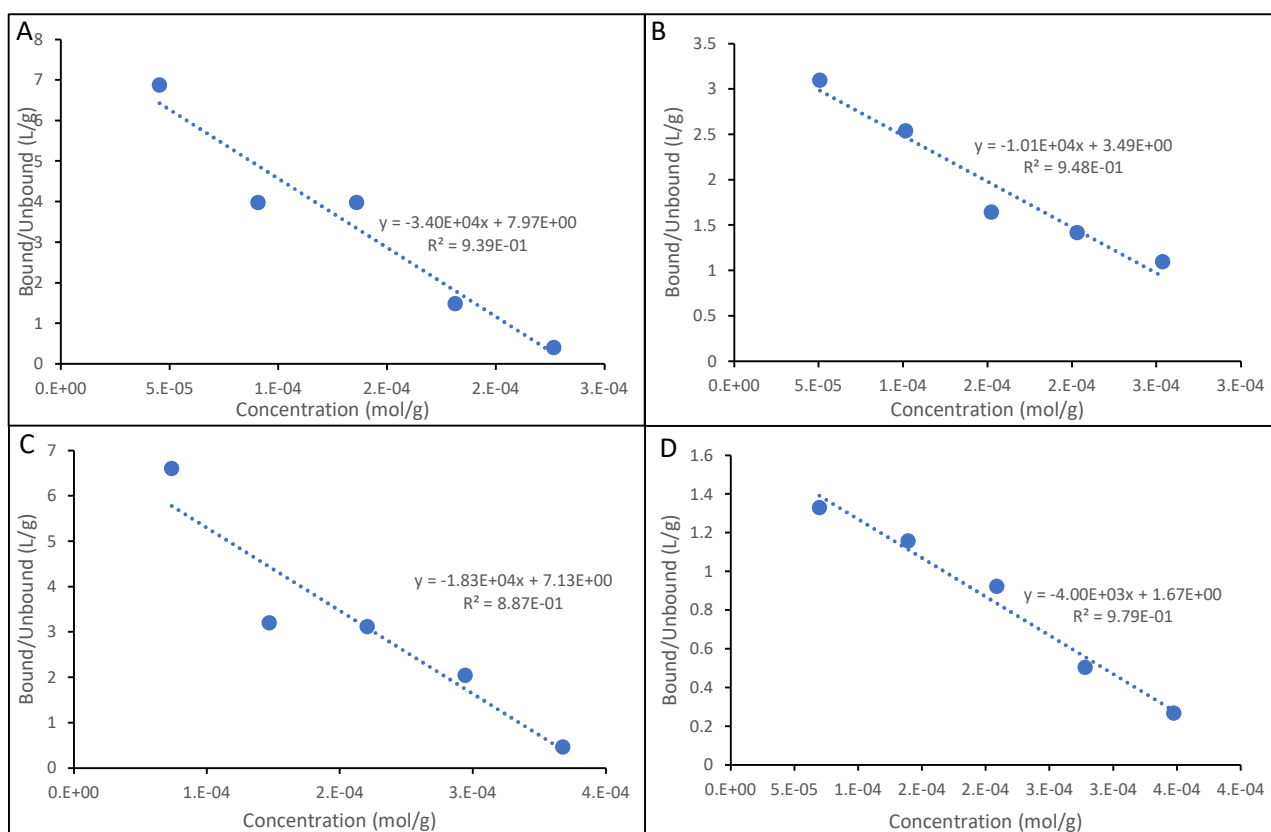

**Figure S4:** Scatchard analysis plot for the binding of the target molecules to the control non-imprinted polymers (NIPs): andarine (A), RAD-140 (B), estradiol (C), testosterone (D).

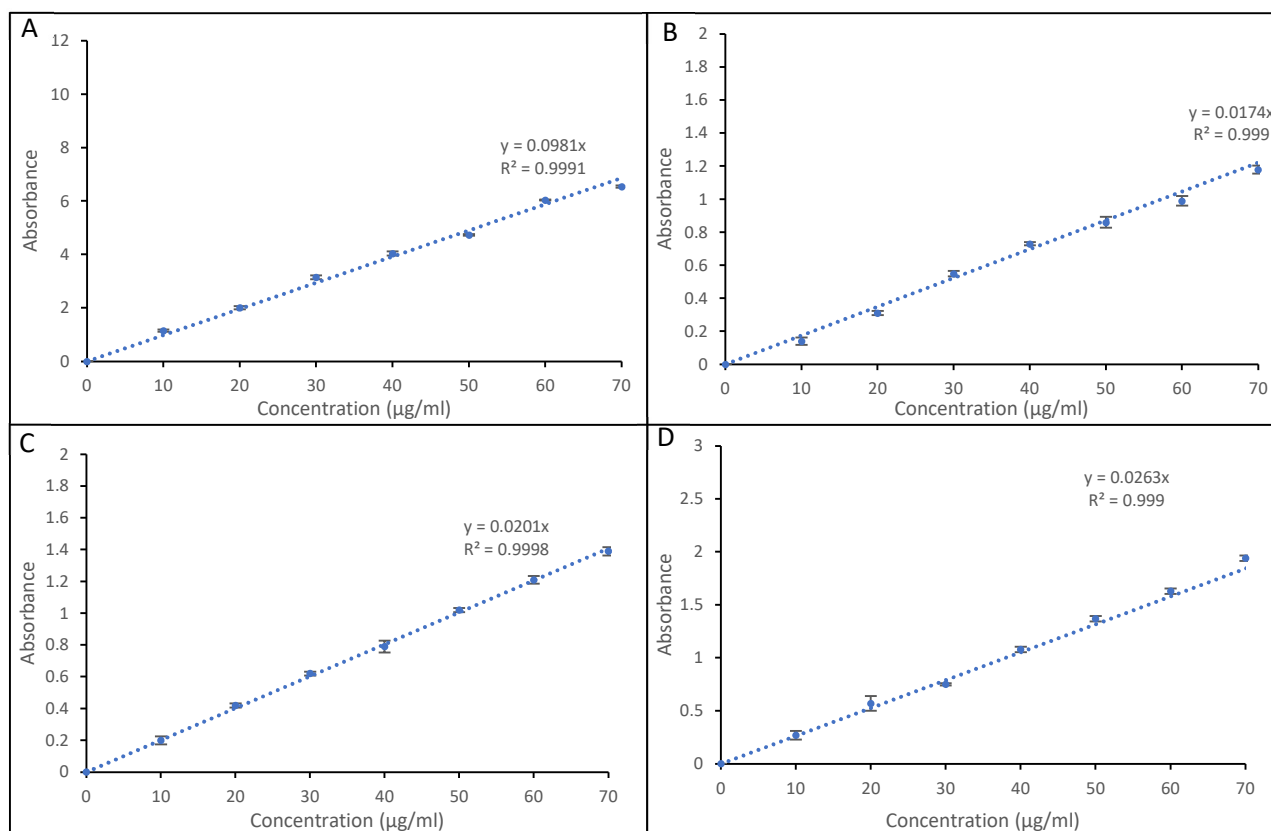

**Figure S5:** Calibration plots of the target molecules: Andarine (A), RAD-140 (B), Estradiol (C) and Testosterone (D), in River Water, obtained using a Nanodrop One Spectrophotometer.
